# Supplementary material for: Heterozygous variants in PLCG1 affect hearing, vision, cardiac, and immune function
Source: eLife. 2025 Aug 27;13:RP95887. doi: 10.7554/eLife.95887 (PMC12387771; doi:10.7554/eLife.95887)
Supplement: Figure 1—figure supplement 1—source data 1. [file elife-95887-fig1-figsupp1-data1.xls]

## Sheet: result
PLC	Human Gene	Fly ortholog
Phospholipase Cβ	PLCB1, PLCB2, PLCB3	Plc21C (Phospholipase C at 21C)
	PLCB4	norpA (no receptor potential A)
Phospholipase Cɣ	PLCG1, PLCG2	sl (small wing)
Phospholipase Cδ	PLCD1, PLCD3, PLCD4	-
Phospholipase Cε	PLCE4	-
Phospholipase Cη	PLCH1, PLCH2	-
Phospholipase Cζ	PLCZ1	-
