# Supplementary material for: Heterozygous variants in PLCG1 affect hearing, vision, cardiac, and immune function
Source: eLife. 2025 Aug 27;13:RP95887. doi: 10.7554/eLife.95887 (PMC12387771; doi:10.7554/eLife.95887)
Supplement: Figure 1—figure supplement 2—source data 1. [file elife-95887-fig1-figsupp2-data1.xlsx]

## Sheet: Sheet1
qPCR of slT2A and slKO
Relative mRNA expression of sl, vesus rp49
w1118	slT2A	slKO
0.699719	0.0401159	0
1.00766	0.0217695	0.0007879
0.923845	0.0108945	0.0015269
	0.0442415	0.0045908
