# Supplementary material for: Heterozygous variants in PLCG1 affect hearing, vision, cardiac, and immune function
Source: eLife. 2025 Aug 27;13:RP95887. doi: 10.7554/eLife.95887 (PMC12387771; doi:10.7554/eLife.95887)
Supplement: Figure 2—source data 1. [file elife-95887-fig2-data1.xlsx]

## Sheet: Figure 2B
Quantification of adult wing size of slT2A mutant flies, rescued by genomic rescue (GR) construct and flip-out of the T2A cassette
Adult wing size
w1118	slT2A / Y	slT2A / Y; GR	slT2A / Y; UAS-Flp
1.37559	1.03783	1.20305	1.27273
1.352	1.04476	1.28619	1.19779
1.32784	1.09594	1.20485	1.20459
1.33208	1.1012	1.25071	1.23473
1.37283	1.03883	1.2804	1.21991
1.24858	1.08588	1.20614	1.34326
1.23719	1.13547	1.36269	1.29634
1.25137	1.07498	1.28364	1.36544
1.27889	1.10046	1.36142	1.33064
1.2964	1.09224	1.36234	1.25918
1.29268		1.25546	1.30685

## Sheet: Figure 2C
Quantification of extra R7 photoreceptors of slT2A mutant flies, rescued by genomic rescue (GR) construct
Percentage of the ommatidia with abnormal photoreceptor number
w1118	slT2A / Y	slT2A / Y; GR
0.44	25.89	0
0	63.64	0.35
0.48	44.16	0
0	39.39	0.74
0	67.06	0
0	56.31	0
0	52.51	0.38
	38.89
	56.74
