# Supplementary material for: Heterozygous variants in PLCG1 affect hearing, vision, cardiac, and immune function
Source: eLife. 2025 Aug 27;13:RP95887. doi: 10.7554/eLife.95887 (PMC12387771; doi:10.7554/eLife.95887)
Supplement: Figure 3—source data 1. [file elife-95887-fig3-data1.xlsx]

## Sheet: Figure 3B-1
Lifespan of slT2A mutant flies and rescue by slWT cDNA
Days elapsed	w1118	slT2A /Y	slT2A /Y; slWT
33	1
33	1
37	1
37	1
39	1
39	1
39	1
43	1
43	1
43	1
43	1
45	1
45	1
47	1
47	1
47	1
47	1
47	1
47	1
49	1
49	1
49	1
51	1
55	1
55	1
55	1
55	1
55	1
55	1
55	1
55	1
55	1
57	1
57	1
57	1
59	1
59	1
59	1
59	1
59	1
59	1
59	1
59	1
59	1
59	1
59	1
61	1
61	1
61	1
63	1
63	1
63	1
63	1
63	1
63	1
63	1
65	1
65	1
65	1
65	1
65	1
65	1
65	1
65	1
65	1
65	1
65	1
67	1
67	1
67	1
67	1
67	1
67	1
67	1
67	1
69	1
69	1
69	1
69	1
71	1
71	1
71	1
71	1
71	1
71	1
71	1
71	1
71	1
71	1
71	1
71	1
71	1
71	1
71	1
71	1
71	1
73	1
73	1
73	1
73	1
73	1
75	1
75	1
77	1
77	1
77	1
81	1
7	0
7	0
7	0
53	0
53	0
67	0
67	0
Days elapsed	w1118	slT2A /Y	slT2A /Y; slWT
3		1
3		1
13		1
15		1
17		1
19		1
19		1
21		1
21		1
23		1
25		1
25		1
25		1
25		1
27		1
27		1
27		1
27		1
27		1
29		1
29		1
29		1
29		1
29		1
29		1
29		1
29		1
29		1
31		1
31		1
31		1
31		1
31		1
33		1
33		1
35		1
35		1
35		1
35		1
35		1
35		1
35		1
37		1
37		1
37		1
37		1
37		1
37		1
37		1
37		1
37		1
37		1
37		1
37		1
37		1
37		1
39		1
39		1
39		1
39		1
39		1
39		1
41		1
41		1
41		1
41		1
41		1
41		1
41		1
41		1
43		1
43		1
43		1
43		1
43		1
43		1
43		1
43		1
45		1
45		1
45		1
45		1
45		1
45		1
45		1
45		1
47		1
47		1
47		1
47		1
47		1
49		1
49		1
49		1
49		1
49		1
49		1
49		1
49		1
51		1
51		1
53		1
55		1
57		1
59		1
61		1
65		1
65		1
69		1
23		0
27		0
63		0
49		0
37		0
37		0
Days elapsed	w1118	slT2A /Y	slT2A /Y; slWT
9			1
39			1
47			1
49			1
51			1
51			1
53			1
55			1
55			1
55			1
57			1
57			1
57			1
57			1
57			1
57			1
59			1
59			1
61			1
61			1
61			1
61			1
61			1
63			1
63			1
63			1
63			1
63			1
63			1
63			1
63			1
63			1
65			1
65			1
65			1
65			1
65			1
67			1
67			1
67			1
69			1
69			1
69			1
69			1
69			1
69			1
69			1
69			1
69			1
69			1
69			1
69			1
69			1
71			1
71			1
71			1
71			1
71			1
71			1
71			1
71			1
71			1
71			1
71			1
71			1
71			1
73			1
73			1
73			1
73			1
73			1
73			1
73			1
73			1
75			1
75			1
75			1
75			1
75			1
75			1
75			1
75			1
75			1
75			1
75			1
77			1
77			1
77			1
77			1
77			1
77			1
79			1
79			1
79			1
79			1
79			1
79			1
79			1
79			1
79			1
79			1
79			1
79			1
81			1
81			1
81			1
81			1
81			1
83			1
83			1
83			1
83			1
83			1
83			1
85			1
85			1
85			1
85			1
87			1
87			1
87			1
91			1
91			1
57			0
73			0

## Sheet: Figure 3B-2
Climbing ability of slT2A mutant flies and rescue by slWT cDNA
Percentage of flies climbing over 5cm in 15s
Day 7				Day 35
w1118	slT2A /Y	slT2A /Y; slWT		w1118	slT2A /Y	slT2A /Y; slWT
95	42	95		85	4.5	80
80	61	100		70	4.5	73.7
90	58	83		55	4.5	68.4
95	50	89		35	0	89.5
90	61	100		66.7		52.4
85	67	94		42.9		50
95	65	88		85.7		55
100	58	100		66.7		78.9
100	58	89		70		30
95	58	100		72.2		45.5
95	53	95		72.7		38.9
90	58			63.6		61.1
90						45.5
Day 7																Day 35
w1118																w11118
SUM	21	20	20	20	20	20	20	20	20	20	19	20	20			SUM	20	20	20	20	21	21	21	18	20	18	22	22
	5.5	0	2.5	9.5	14.5	16	7	5.5	7	0.5	6.5	18.5	3.5				1	1.5	2	2	13.5	8.5	12	17.5	18.5	17	0	16.5
	6	6.5	2.5	9.5	14.5	15.5	9.5	11.5	10	10	9.5	12.5	4.5				9.5	3.5	2.5	5	12.5	4.5	8	15	12.5	16.5	0	14.5
	8.5	7	9.5	10.5	9	13.5	9.5	13.5	16	13.5	11.5	7.5	7.5				11	4.5	7.5	9.5	9.5	2	5	12	9	15.5	12	13.5
	17.5	8	9.5	11	8.5	6.5	10.5	18.5	17	14	12	7.5	7.5				12	6.5	12.5	10	7	2	3.5	10.5	7.5	13.5	10	13
	7	14.5	10.5	12.5	6.5	4.5	11	14	18.5	15	12.5	6	9.5				13	10	0	11.5	5.5	0	2	8.5	6	9	9.5	12
	11.5	9	11.5	13.5	2	0.5	13	9	18.5	16.5	13.5	12.5	11				15	11.5	2	0	0	0	16	2	6	8.5	9.5	10.5
	18.5	18.5	12.5	18	8.5	17	2	9.5	15	17	14.5	18.5	11.5				18.5	14	9.5	0	10.5	0	15	0	6	6.5	7.5	10
	14	7.5	13.5	18.5	8.5	16.5	8.5	14.5	18	18.5	17	18.5	15.5				2	10.5	10.5	1	10	0	11.5	9	5.5	5.5	7.5	8.5
	18.5	7.5	14.5	18.5	7.5	9	11	17	18	18.5	17.5	15.5	16.5				2	10	14.5	1.5	9.5	0	6.5	9	0	2.5	5.5	8.5
	8	6.5	12.5	3	14.5	0	12.5	17.5	18.5	18.5	0	14.5	18.5				7	9.5	9	2.5	9.5	15.5	17.5	17	0	1	4	8
	8	5	12.5	15.5	2	18.5	13	18.5	18.5	10.5	9	0	8				12	7.5	1	3.5	9	7	11.5	0	0	1	2	0
	11.5	4	12.5	15.5	7.5	2.5	14	18.5	18.5	15	10.5	1.5	8.5				18.5	7.5	1.5	4	5.5	7	11	0	2	15	1	0
	15	2.5	13.5	16.5	7.5	9.5	17.5	10	18.5	15.5	11	5.5	9				12.5	4	1.5	14	3.5	3.5	10	14.5	2	10.5	8.5	0
	18.5	18.5	16.5	18.5	9.5	13	18.5	11	18.5	16.5	11	7	9				13	2.5	4	0	2	0	9.5	12.5	3	10.5	9.5	1.5
	18.5	18.5	16.5	5.5	11.5	13.5	18	11.5	9.5	17	15	9.5	9.5				13.5	0	4.5	0.5	1.5	18	8	11.5	5.5	7.5	12.5	2.5
	18.5	16	18.5	11	13	15	15.5	18	11.5	18.5	16.5	12.5	12.5				18	0	5	2.5	0	12	0	7.5	5.5	5	13.5	12
	18.5	13	18.5	18.5	13	12	14	18.5	13.5	18.5	18.5	14	18.5				7.5	7	13	2.5	0	9	8.5	4.5	6	2.5	18	0
	17	10.5	8	18.5	13.5	18.5	11.5	18.5	18.5	18.5	18.5	15	18.5				10.5	8	7.5	5.5	4.5	7.5	9	0	7	2	11	0
	15.5	7.5	6.5	18.5	15	11	11	18.5	18.5	18.5	18.5	17.5	18.5				11	10	8.5	7.5	5	5.5	10.5		8		8	2.5
	13	3.5	16.5	10	18.5	17	9	18.5	18.5	18.5		18.5	18.5				18.5	14	8.5	9.5	6	3	11		18.5		7.5	10
	3																				8	0	12.5				5.5	14
>=5	20	16	18	19	18	17	19	20	20	19	18	18	18														0	7.5
Percentage	0.952381	0.8	0.9	0.95	0.9	0.85	0.95	1	1	0.95	0.947368	0.9	0.9			>=5	17	14	11	7	14	9	18	12	14	13	16	14
																Percentage	0.85	0.7	0.55	0.35	0.666667	0.428571	0.857143	0.666667	0.7	0.722222	0.727273	0.636364
sl-T2A/Y																sl-T2A/Y
SUM	19	18	19	20	18	18	20	19	19	19	19	19				SUM	22	22	22	22
	3.5	3.5	1	1.5	0	0	0	1	0	7.5	3	17					0	0	0	0
	4.5	10	2	2.5	7	0	1	3.5	9	9.5	3.5	13.5					0	0	0	1.5
	9.5	16.5	3.5	3.5	7	1.5	3.5	3.5	10.5	15.5	4.5	8.5					0	2.5	0	2
	0.5	17	4	4	9.5	3.5	3.5	4	16	0	7	7.5					0	4	0	0
	18.5	18.5	5	5	11	5.5	4.5	5	17.5	0	7.5	7.5					0	0	0	0
	1.5	0	9	6.5	18.5	7	5	6	0	3	8.5	6					0	0	0	0
	2.5	1	9.5	6.5	1.5	8	7.5	6	1.5	6	10	3.5					0	0	0	0
	2.5	2.5	9.5	10	2.5	13	7.5	10.5	11	5	0	2.5					0	2	0	0
	3	2.5	11	13.5	3.5	15	8.5	1.5	7	0	2	2.5					2	10.5	0.5	0
	6.5	5.5	18.5	10.5	11.5	18.5	14	5	8	3	3	8					2	0	1.5	0
	7.5	9.5	18.5	11.5	5.5	18.5	12.5	13.5	0	6.5	4.5	0					0	0	1.5	0
	12.5	1.5	17	12	0	18.5	14	14	2.5	12.5	3.5	3.5					0	0	0	0
	3.5	2	7	16.5	4.5	10.5	9.5	0.5	4	3.5	8.5	5					0	0	0	0
	2.5	7.5	5	17	5	8.5	9.5	9.5	14	8.5	9	9					0	0	0.5	0.5
	1.5	18.5	0	18.5	0	3.5	9.5	11.5	12	17	12.5	16.5					0	0.5	0.5	2.5
	4	14.5	1.5	0	6	18.5	18.5	9	2	0	13	11.5					0	0	0	0
	6.5	18.5	4	0	6.5	9.5	1	0.5	5.5	0.5	4	0					0	0	0	0
	12	18.5	7	0.5	18.5	0	1.5	4	7.5	2.5	8.5	1.5					1.5	0	4.5	0
	9.5		2	2			16.5	6	2	10	8.5	3.5					4.5	0	6	0
				4			18.5										5.5	1.5	0	0
>=5	8	11	11	10	11	12	13	11	11	11	10	11					0	0	0	0
Percentage	0.421053	0.611111	0.578947	0.5	0.611111	0.666667	0.65	0.578947	0.578947	0.578947	0.526316	0.578947					0	0	2	0
																>=5	1	1	1	0
																Percentage	0.0454545	0.0454545	0.0454545	0
sl-WT																sl-WT
SUM	19	17	18	18	18	17	17	18	19	19	19					SUM	20	19	19	19	21	18	20	19	20	22	18	18
	18.5	18.5	2.5	3.5	11.5	14	4.5	8.5	3.5	11.5	6						7.5	18	4	2	18	0	17.5	18	17.5	13	18	18.5
	18.5	18.5	5	4	16	14	6.5	17.5	10.5	11.5	13.5						8.5	11.5	4	9	10	2.5	11.5	18	7	10.5	17.5	16.5
	18.5	17.5	8	5	17	18.5	7.5	18.5	13.5	15	15.5						9	9	6.5	13	2.5	9.5	7.5	12.5	2	7.5	17.5	16.5
	17	17	9	13	18.5	18.5	8.5	18.5	15.5	15.5	16.5						9.5	18.5	6.5	13	0	10.5	3	11	0	0	15.5	14.5
	14.5	16.5	10	15	18.5	18.5	16.5	18.5	18	16.5	18.5						18.5	18.5	11	14	0	14.5	1.5	9.5	0	0	12.5	14
	13	5.5	14.5	18.5	13.5	18.5	18.5	18.5	18.5	16.5	18.5						2	14	11.5	18.5	0.5	9	0	9	10	10.5	11	9.5
	18.5	9	17.5	18.5	17	18.5	2	18.5	18.5	17.5	18.5						5	0	0.5	15.5	3.5	0	0	9	9	10.5	7.5	9.5
	18.5	13.5	18	18.5	17.5	2.5	5.5	18.5	18.5	18	18.5						7	0	4	14	4	0	0	7.5	7	9.5	4.5	8.5
	12.5	18.5	18.5	18.5	18	4.5	12	10	18.5	18.5	18.5						0	0	6	13	9.5	2	18	5.5	6.5	6	2.5	8
	2.5	18.5	0	18.5	18.5	13.5	13.5	10.5	18.5	9.5	1.5						2	7.5	7	12	16.5	3.5	13	0	0	3.5	0	6
	6.5	10	4	12	18.5	14	18.5	13	1	9.5	5.5						8	8.5	8	10.5	12	18.5	12	0	0	2.5	0	5
	7	17.5	5	17.5	18.5	16	18.5	14.5	6	12	7						9	11	18.5	7.5	15		10.5	16.5	4	0	0	2.5
	9	17.5	6	18	18.5	18.5	18.5	17	10	14	8						12	13	18.5	6	11.5	14	9.5	14	2	0	0	0
	9	18.5	9.5	18.5	18.5	18.5	18.5	18.5	12	16.5	12.5						12	13.5	16.5	13.5	5	13	8	7.5	0.5	0	0	0
	13.5	18.5	11	18.5	18.5	18.5	18.5	18.5	14.5	18.5	17						12	17.5	10	11.5	0	7.5	7	6	0	0	0	0
	18.5	18.5	15.5	18.5	18.5	18.5	18.5	18.5	15	18.5	18						6	0	10	9	0	3.5	6.5	2.5	0	0	0	0
	18.5	17.5	18	18.5	18.5	18.5	18.5	18.5	18	18.5	18						7	4.5	9	5.5	18	0	1.5	0	0	10	0	0
	18.5		18.5	18.5	18.5			18.5	18	18.5	18.5							7.5	4	0	13.5	0	0	10	0	8.5	0	0
	18.5								18.5	18.5	18.5						11	11.5	3.5	8	5.5	5	0	9.5	0	6
>=5	18	17	15	16	18	16	15	18	17	19	18						7				3.5		0		0	3
Percentage	0.947368	1	0.833333	0.888889	1	0.941176	0.882353	1	0.894737	1	0.947368						2.5				0					3
																										1.5
																>=5	16	14	13	17	11	9	11	15	6	10	7	11
																Percentage	0.8	0.736842	0.684211	0.894737	0.52381	0.5	0.55	0.789474	0.3	0.454545	0.388889	0.611111
