# Supplementary material for: Heterozygous variants in PLCG1 affect hearing, vision, cardiac, and immune function
Source: eLife. 2025 Aug 27;13:RP95887. doi: 10.7554/eLife.95887 (PMC12387771; doi:10.7554/eLife.95887)
Supplement: Figure 4—figure supplement 1—source data 1. [file elife-95887-fig4-figsupp1-data1.xlsx]

## Sheet: Figure 4-supplement 1B
Lifespan of flies with audlt-stage expression of sl cDNAs
Tub-GAL4; Tub-GAL80ts > UAS-sl cDNAs
Days elapsed	WT	H384R	D1041G	D1184G
3	1
11	1
11	1
13	1
13	1
15	1
17	1
23	1
25	1
25	1
27	1
27	1
27	1
27	1
29	1
29	1
29	1
31	1
31	1
31	1
31	1
31	1
31	1
31	1
31	1
31	1
31	1
31	1
31	1
31	1
33	1
33	1
33	1
33	1
33	1
33	1
35	1
35	1
35	1
35	1
35	1
35	1
35	1
35	1
35	1
35	1
37	1
37	1
37	1
39	1
Days elapsed	WT	H384R	D1041G	D1184G
7		1
9		1
9		1
11		1
15		1
17		1
17		1
17		1
17		1
19		1
19		1
19		1
19		1
19		1
19		1
19		1
19		1
19		1
21		1
21		1
21		1
21		1
21		1
21		1
23		1
23		1
23		1
23		1
23		1
23		1
23		1
23		1
23		1
23		1
23		1
23		1
23		1
23		1
23		1
23		1
25		1
25		1
25		1
25		1
25		1
25		1
25		1
25		1
25		1
25		1
25		1
27		1
27		1
27		1
27		1
27		1
27		1
27		1
27		1
27		1
29		1
29		1
29		1
29		1
29		1
29		1
29		1
29		1
29		1
29		1
29		1
29		1
29		1
29		1
31		1
31		1
31		1
31		1
31		1
31		1
31		1
31		1
31		1
31		1
31		1
33		1
33		1
33		1
33		1
33		1
33		1
33		1
33		1
33		1
33		1
33		1
35		1
35		1
35		1
35		1
37		1
39		1
Days elapsed	WT	H384R	D1041G	D1184G
3			1
3			1
5			1
7			1
11			1
11			1
11			1
11			1
11			1
11			1
11			1
11			1
13			1
13			1
13			1
13			1
13			1
13			1
13			1
15			1
15			1
15			1
15			1
17			1
17			1
17			1
17			1
17			1
17			1
17			1
17			1
17			1
17			1
19			1
19			1
19			1
19			1
19			1
19			1
19			1
19			1
19			1
19			1
19			1
19			1
19			1
19			1
19			1
19			1
19			1
19			1
19			1
19			1
19			1
19			1
21			1
21			1
21			1
21			1
21			1
21			1
21			1
21			1
21			1
21			1
21			1
21			1
21			1
21			1
21			1
21			1
21			1
21			1
21			1
21			1
21			1
21			1
21			1
21			1
21			1
21			1
21			1
21			1
21			1
21			1
21			1
21			1
21			1
21			1
21			1
21			1
21			1
21			1
21			1
21			1
21			1
21			1
21			1
21			1
21			1
21			1
21			1
21			1
21			1
21			1
23			1
23			1
23			1
23			1
23			1
23			1
23			1
23			1
23			1
23			1
23			1
23			1
23			1
23			1
23			1
25			1
25			1
25			1
25			1
25			1
25			1
27			1
27			1
27			1
27			1
29			1
29			1
Days elapsed	WT	H384R	D1041G	D1184G
3				1
3				1
3				1
3				1
3				1
3				1
3				1
3				1
3				1
3				1
3				1
3				1
3				1
3				1
3				1
3				1
3				1
5				1
5				1
5				1
5				1
5				1
5				1
5				1
5				1
5				1
5				1
5				1
5				1
5				1
5				1
5				1
5				1
5				1
5				1
5				1
5				1
5				1
5				1
5				1
5				1
5				1
5				1
5				1
5				1
5				1
5				1
5				1
5				1
5				1
5				1
5				1
5				1
5				1
5				1
5				1
5				1
5				1
5				1
5				1
5				1
5				1
5				1
5				1
5				1
5				1
5				1
5				1
5				1
5				1
5				1
5				1
7				1
7				1
7				1
7				1
7				1
7				1
7				1
7				1
7				1
7				1
7				1
7				1
7				1
7				1
7				1
7				1
7				1
7				1
7				1
7				1
7				1
7				1
7				1
7				1
7				1
7				1
7				1
7				1
7				1
7				1
7				1
7				1
7				1
9				1
9				1
9				1
9				1
9				1
9				1
9				1
9				1
11				1
15				1
15				1
27				1

## Sheet: Figure 4-supplement C
Climbing ability of flies with audlt-stage expression of sl cDNAs, at Day 20
Climbing distance in 15s
Tub-GAL4; Tub-GAL80ts > UAS-sl cDNAs
WT	H384R	D1041G
3	9	0
3	7.5	0
4.5	7.5	0
5.5	12	0
12.5	0.5	3.5
0	4	4.5
2	8	7
9.5	8.5	8
9.5	8.5	8
13.5	10	8
13.5	12.5	8
15	1	8
15.5	2.5	9.5
16.5	4	0
17.5	4	0
17.5	7.5	0
18	8	0.5
0	8.5	0.5
2	9.5	6.5
5.5	15	8.5
7.5	15.5	8.5
7.5	0.5	8.5
8	5.5	9
10	6.5	9
14.5	7.5	9.5
	7.5	9.5
	8	0
	9.5	3
	13.5	5
	16	7
	18.5	7.5
		8
		8
		8
		8.5
		9
		11.5
		13.5
		14.5
