# Supplementary material for: Heterozygous variants in PLCG1 affect hearing, vision, cardiac, and immune function
Source: eLife. 2025 Aug 27;13:RP95887. doi: 10.7554/eLife.95887 (PMC12387771; doi:10.7554/eLife.95887)
Supplement: Figure 4—figure supplement 2—source data 1. [file elife-95887-fig4-figsupp2-data1.xlsx]

## Sheet: Figure 4-supplement 2A
Eclosion rate of slT2A > UAS-PLCG1 cDNA flies at 22C
Ratio of the progeny with desired genotype (Expected to be 0.25)
Males	slT2A/Y; UAS-PLCG1 cDNA
w1118	Empty	Reference	H380R	D1019G	D1165G	L597F
0.217195	0.189474	0.0440529	0	0	0	0.0120968
0.232558	0.274194	0.0923913	0.05	0	0	0.0117188
0.217391	0.185185	0.00854701	0.0148148	0	0	0.0205761
0.198347	0.114754	0.0123457	0.03	0	0
0.268987		0.0564516	0	0	0
		0.0806452	0
		0.038674	0
Females	slT2A/ yw; UAS-PLCG1 cDNA
w1118	Empty	Reference	H380R	D1019G	D1165G	L597F
0.273756	0.231579	0.361233	0.151724	0	0	0.362903
0.227907	0.266129	0.309783	0.25	0	0	0.28125
0.3083	0.259259	0.354701	0.355556	0	0	0.341564
0.264463	0.393443	0.32716	0.37	0	0
0.199367		0.342742	0.33	0	0
		0.322581	0.360465
		0.259669	0.240964

## Sheet: Figure 4-supplement 2B
Viability of flies with ubiquitous overexpression (Tub-GAL4) of UAS-PLCG1Reference at different temperatures
Tub-GAL4/TM6B x UAS-PLCG1Reference				The expected number of adult progeny flies with the Tub>PLCG1Reference genotype is half of the total adult progeny
	Total	Tub-GAL4	TM6B	Observed/Expected	Description
29C	97	18	79	0.3711	~63% lethal
25C	327	93	234	0.5688	~43% lethal
22C	97	44	53	0.9072	Mostly viable

## Sheet: Figure 4-supplement 2C
Viability of flies with ubiquitous overexpression (da-GAL4) of UAS-PLCG1 cDNAs
da-GAL4 x UAS-PLCG1 cDNAs/TM6B				The expected number of adult progeny flies with the da>PLCG1 genotype is half of the total adult progeny
UAS-PLCG1D1041G and UAS-PLCG1D1165G at 25C were quantified; The other groups were described qualitatively.
	Total	PLCG1 cDNA	TM6B	Observed/Expected	Description
D1041G	170	17	153	0.2	~80% lethal
D1165G	140	11	129	0.1571	~84% lethal
