# Supplementary material for: Heterozygous variants in PLCG1 affect hearing, vision, cardiac, and immune function
Source: eLife. 2025 Aug 27;13:RP95887. doi: 10.7554/eLife.95887 (PMC12387771; doi:10.7554/eLife.95887)
Supplement: Figure 4—figure supplement 3—source data 1. [file elife-95887-fig4-figsupp3-data1.xlsx]

## Sheet: Figrue 4-supplement 3
Quantification of adult wing size of slT2A mutant flies, rescued by slWT but not PLCG1Reference
Adult wing size
slT2A/Y; UAS-cDNAs
Empty	slWT	PLCG1Reference
1.04597	1.11052	1.02937
1.01229	1.16929	0.982181
1.07496	1.08285	1.00582
1.05384	1.12896	1.01511
1.03928	1.12152	1.08208
	1.23026	1.06143
	1.23401	1.13733
	1.17254	1.13843
	1.2075	0.98005
	1.28623	1.12386
		1.01611
		1.01032
Quantification of extra R7 photoreceptor of slT2A mutant flies, rescued by slWT but not PLCG1Reference
Percentage of the ommatidia with abnormal photoreceptor number
slT2A/Y; UAS-cDNAs
Empty	slWT	PLCG1Reference
5.51	0	8.33
29.86	0	21.54
32.88	0	8.75
5.67	0	10.88
33.79	0	8.26
10.75	0	10.24
6.83	0	5.82
27.42	0
32.43	0
38.3
5.66
4.17
5.33
