# Supplementary material for: Heterozygous variants in PLCG1 affect hearing, vision, cardiac, and immune function
Source: eLife. 2025 Aug 27;13:RP95887. doi: 10.7554/eLife.95887 (PMC12387771; doi:10.7554/eLife.95887)
Supplement: Figure 4—source data 1. [file elife-95887-fig4-data1.xlsx]

## Sheet: Figure 4A
Eclosion rate of slT2A > UAS-sl cDNA flies at 25C
Ratio of the progeny with desired genotype (Expected to be 0.25)
Males	slT2A/Y; UAS-sl cDNA
w1118	Empty	WT	H384R	D1041G	D1184G	L630F
0.180247	0.125	0.27758	0.00531915	0	0	0.209581
0.169162	0.103896	0.258947	0.00571429	0	0	0.111111
0.149897	0.104046	0.191781	0.00746269	0	0	0.167883
0.171533	0.139918	0.3	0	0	0	0.181208
	0.202381	0.201238	0	0	0
	0.191083		0
Females	slT2A/yw; UAS-sl cDNA
w1118	Empty	WT	H384R	D1041G	D1184G	L630F
0.308642	0.34375	0.24911	0.0797872	0	0	0.197605
0.284431	0.298701	0.258947	0.125714	0	0	0.197531
0.291581	0.320809	0.305936	0.11194	0	0	0.189781
0.211679	0.345679	0.245161	0.10274	0	0	0.228188
	0.202381	0.280186	0.0676157	0	0
	0.261146		0.154472

## Sheet: Figure 4B
Eclosion rate of slT2A > UAS-PLCG1 cDNA flies at 25C
Ratio of the progeny with desired genotype (Expected to be 0.25)
Males	slT2A/Y; UAS-PLCG1 cDNAs or PLCG2 reference
w1118	Empty	Reference	H380R	D1019G	D1165G	L597F	D1165H	H380A	S1021F	PLCG2 Reference
0.180247	0.125	0.0107914	0	0	0	0	0	0	0.0368664	0.0197368
0.169162	0.103896	0.0373832	0.0175439	0	0	0.0104167	0	0	0.00995025	0.011236
0.149897	0.104046	0.0361446	0	0	0	0	0	0	0.0185185	0.020339
0.171533	0.139918	0.0222222	0	0	0	0	0	0.005	0	0.0153846
	0.202381	0.01	0	0	0	0.00757576	0	0
	0.191083		0.00769231
Females	slT2A/yw; UAS-PLCG1 cDNAs or PLCG2 reference
w1118	Empty	Reference	H380R	D1019G	D1165G	L597F	D1165H	H380A	S1021F	PLCG2 Reference
0.308642	0.34375	0.341727	0.276923	0	0	0.353191	0	0.375	0.276498	0.342105
0.284431	0.298701	0.34891	0.333333	0	0	0.364583	0	0.313953	0.353234	0.325843
0.291581	0.320809	0.321285	0.190476	0	0	0.307692	0	0.212963	0.37963	0.328814
0.211679	0.345679	0.275556	0.342282	0	0	0.347518	0	0.34	0.192308	0.369231
	0.202381	0.31	0.333333	0	0	0.348485	0	0.390244
	0.261146		0.361538
