# Supplementary material for: Heterozygous variants in PLCG1 affect hearing, vision, cardiac, and immune function
Source: eLife. 2025 Aug 27;13:RP95887. doi: 10.7554/eLife.95887 (PMC12387771; doi:10.7554/eLife.95887)
Supplement: Figure 5—figure supplement 2—source data 1. [file elife-95887-fig5-figsupp2-data1.xlsx]

## Sheet: Figure 5-supplement 2A
Quantification of adult wing size of flies with wing-specific overexpression of slWT or PLCG1Reference
Adult wing size
nub-GAL4>UAS-cDNAs
Empty	slWT	PLCG1Reference
1.18453	1.06313	1.06836
1.15283	1.04462	1.05196
1.21262	1.04603	1.05819
1.22864	1.08829	1.05694
1.15405	1.05458	1.07906
1.18853	1.03268	1.02189
1.21972	1.08209	1.03285
1.16557	0.998452	1.06868
1.17686	0.999265	1.05379
1.22388	1.049	1.05659

## Sheet: Figure 5-supplement 2B
Quantification of the pecentage of notched adult wings caused by wing-specific overexpression of PLCG1 cDNAs
Percentage of wings with notching margin
nub-GAL4>UAS-cDNAs
Reference	H380R	L597F	H380A	S1021F
0.105769	0.205128	0.206897	0.031746	0.054054
0.130952	0.193548	0.21875	0.016949	0.04
0.088608	0.193548	0.308824	0.013333	0.034483
0.093023	0.162791	0.201681		0.144737
0.121951

## Sheet: Figure 5-supplement 2D
Quantification of the adult eye size of the flies with eye-specific overexpression of PLCG1 cDNAs
Normalized eye size
ey-GAL4>UAS-cDNAs
Empty	Reference	H380R	L597F	D1019G	D1165G
1.05173	0.76808	0.926057	0.67583	0.646079	0.883118
0.872335	0.897142	0.832576	0.720348	0.661219	0.591029
1.08031	0.923803	0.851819	0.787005	0.598003	0.622054
1.0533	0.768564	0.936223	0.696272	0.713452	0.778012
0.942328	0.882021	0.817658	0.904332	0.644064	0.83312
1.04755	0.882173	0.791948	0.962328	0.846634	0.483127
0.995123	0.86367	0.741944	0.865038	0.715409	0.66432
0.979825	0.887613	0.900972	0.870292	0.681867	0.657662
1.05289	0.838934	0.76183	0.793038	0.687598	0.310796
0.983837	0.701944	0.743689	0.807424	0.650209
1.03198	0.826123		0.749445
0.952344	0.874367		0.781192
1.03927	0.886073		0.724476
0.992039	0.892921		0.748358
0.965922	0.824213		0.847849
0.982823	0.760768		0.92487
0.985166	0.782045		0.650549
0.991238	0.91275
1	0.899979
	0.811235
	0.859977
	0.871696
	0.911113
