# Supplementary material for: Heterozygous variants in PLCG1 affect hearing, vision, cardiac, and immune function
Source: eLife. 2025 Aug 27;13:RP95887. doi: 10.7554/eLife.95887 (PMC12387771; doi:10.7554/eLife.95887)
Supplement: Supplementary file 1. [file elife-95887-supp1.xlsx]

## Sheet: Sheet1
Primer	Species	Sequence		Assay
PLCG1 Reference	Hsap.	Forward (5'-3')	GGGGACAAGTTTGTACAAAAAAGCAGGCTTAATGGCGGGCGCCG	Subclone into entry vector
		Reverse (5'-3')	GGGGACCACTTTGTACAAGAAAGCTGGGTT CTAGAGGCGGTTGTCTCCATTG
PLCG1:p.D1019G	Hsap.	Forward (5'-3')	CAAGGGCCAGCGACTGGgTTCCTCCAACTACGATC	Mutagenesis
		Reverse (5'-3')	GATCGTAGTTGGAGGAAcCCAGTCGCTGGCCCTTG
PLCG1:p.H380R	Hsap.	Forward (5'-3')	GTTATTTACCgTGGGCACACCCTTACC	Mutagenesis
		Reverse (5'-3')	GTGTGCCCAcGGTAAATAACTGGCATCCC
PLCG1:p.D1165G	Hsap.	Forward (5'-3')	CGTGGTGTATGAGGAAGgCATGTTTAGTGACCA	Mutagenesis
		Reverse (5'-3')	TGGTCACTAAACATGcCTTCCTCATACACCACG
PLCG1:p.L597F	Hsap.	Forward (5'-3')	CGACTACACGttcTCTTTCTGGC	Mutagenesis
		Reverse (5'-3')	CCCACGAAGGTCTCAC
PLCG1:p.H380A	Hsap.	Forward (5'-3')	GTTATTTACgcTGGGCACACCCTTACCACC	Mutagenesis
		Reverse (5'-3')	GTGTGCCCAgcGTAAATAACTGGCATCCC
PLCG1:p.D1165H	Hsap.	Forward (5'-3')	GTATGAGGAAcACATGTTTAGTGACCAGAATTTCC	Mutagenesis
		Reverse (5'-3')	ACTAAACATGTgTTCCTCATACACCACGAAGCG
PLCG1:p.S1021F	Hsap.	Forward (5'-3')	CTGGATTCCTtCAACTACGATCCTTTGC	Mutagenesis
		Reverse (5'-3')	TCGCTGGCCCTTGGGGTA
sl wild-type	Dmel.	Forward (5'-3')	GGGGACAAGTTTGTACAAAAAAGCAGGCTTAATGAGCTGCTTTAGTGCGATGAGTGC	Subclone into entry vector
		Reverse (5'-3')	GGGGACCACTTTGTACAAGAAAGCTGGGTTTTACGGTGCGGTAACATTTGCTATC
sl:p.D1041G	Dmel.	Forward (5'-3')	CAGCGCCTGGgCTCGTCGAATTTTAATCCCATG	Mutagenesis
		Reverse (5'-3')	TTCGACGAGcCCAGGCGCTGACCCTTCG
sl:p.H384R	Dmel.	Forward (5'-3')	TACATATTTCgCGGCCACACCATTACC	Mutagenesis
		Reverse (5'-3')	GTGTGGCCGcGAAATATGTAGGGCAGATTG
sl:p.D1184G	Dmel.	Forward (5'-3')	CAGGACGAGGgTATGTTCGCCGAGACGC	Mutagenesis
		Reverse (5'-3')	GCGAACATAcCCTCGTCCTGCACTTCG
sl:p.L630F	Dmel.	Forward (5'-3')	AGACTATAGCtttTCGTTCTGGC	Mutagenesis
		Reverse (5'-3')	CCCACAAACGTGGCC
PLCG1 seq1	Hsap.	Forward (5'-3')	CTGAAGAACATGCTGTCC	Sanger verification
PLCG1 seq2	Hsap.	Forward (5'-3')	TCAGATGTCCTGCACACC	Sanger verification
PLCG1 seq3	Hsap.	Forward (5'-3')	CGACTACACGCTCTCTTTC	Sanger verification
PLCG1 seq4	Hsap.	Forward (5'-3')	CAAGTGTGCAGTCAAAGC	Sanger verification
PLCG1 seq5	Hsap.	Forward (5'-3')	CGTGAACAAGGCCAAAG	Sanger verification
PLCG1 seq6	Hsap.	Forward (5'-3')	GCAGTGCCTTTGAAGAAC	Sanger verification
sl seq1	Dmel.	Forward (5'-3')	CAGGTGACCATTAAGGAC	Sanger verification
sl seq2	Dmel.	Forward (5'-3')	GGATCATGCGTTCACCAG	Sanger verification
sl seq3	Dmel.	Forward (5'-3')	GTGGCAGAAAGGAGGCTG	Sanger verification
sl seq4	Dmel.	Forward (5'-3')	ATGGGCTCCAATCTGGAG	Sanger verification
sl seq5	Dmel.	Forward (5'-3')	TCCAGCAGAACACACAAC	Sanger verification
sl qPCR	Dmel.	Forward (5'-3')	GATCAACGAGTCACGCAACG	Real-time PCR
		Reverse (5'-3')	GCCTCCTTTCTGCCACCTTC
